# Supplementary material for: Unique role of jellyfish in the plankton ecosystem revealed using a global ocean biogeochemical model
Source: Copernicus journal article supplement (doi:10.5194/bg-2020-136), 2020-04-30
Supplement: Supplementary file [file bg-2020-136-AC4-supplement.pdf]

**Table 1.** Size range and descriptions of PFT groups used in PlankTOM11. Adapted from Le Quéré et al. (2016).

| Name                   | Abbreviation | Size Range $\mu\text{m}$ | Description/Includes                                                                                                 |
|------------------------|--------------|--------------------------|----------------------------------------------------------------------------------------------------------------------|
| <b>Autotrophs</b>      |              |                          |                                                                                                                      |
| Pico-phytoplankton     | PIC          | 0.5 – 2                  | Pico-eukaryotes and non N <sub>2</sub> -fixing cyanobacteria such as <i>Synechococcus</i> and <i>Prochlorococcus</i> |
| N <sub>2</sub> -fixers | FIX          | 0.7 – 2                  | <i>Trichodesmium</i> and N <sub>2</sub> -fixing unicellular cyanobacteria                                            |
| Coccolithophores       | COC          | 5 – 10                   |                                                                                                                      |
| Mixed-phytoplankton    | MIX          | 2 – 200                  | e.g. autotrophic dinoflagellates and chrysophytes                                                                    |
| Diatoms                | DIA          | 20 – 200                 |                                                                                                                      |
| <i>Phaeocystis</i>     | PHA          | 120 – 360                | Colonial <i>Phaeocystis</i>                                                                                          |
| <b>Heterotrophs</b>    |              |                          |                                                                                                                      |
| Bacteria               | BAC          | 0.3 – 1                  | Here used to subsume both heterotrophic <i>Bacteria</i> and <i>Archaea</i>                                           |
| Protozooplankton       | PRO          | 5 – 200                  | e.g. heterotrophic flagellates and ciliates                                                                          |
| Mesozooplankton        | MES          | 200 – 2000               | Predominantly copepods                                                                                               |
| Macrozooplankton       | MAC          | >2000                    | Euphausiids, amphipods, and others, known as crustacean macrozooplankton                                             |
| Jellyfish zooplankton  | JEL          | 200 – >20,000            | Cnidaria medusae, ‘true jellyfish’                                                                                   |

762

763

764

765

766

767

768

769 (a)

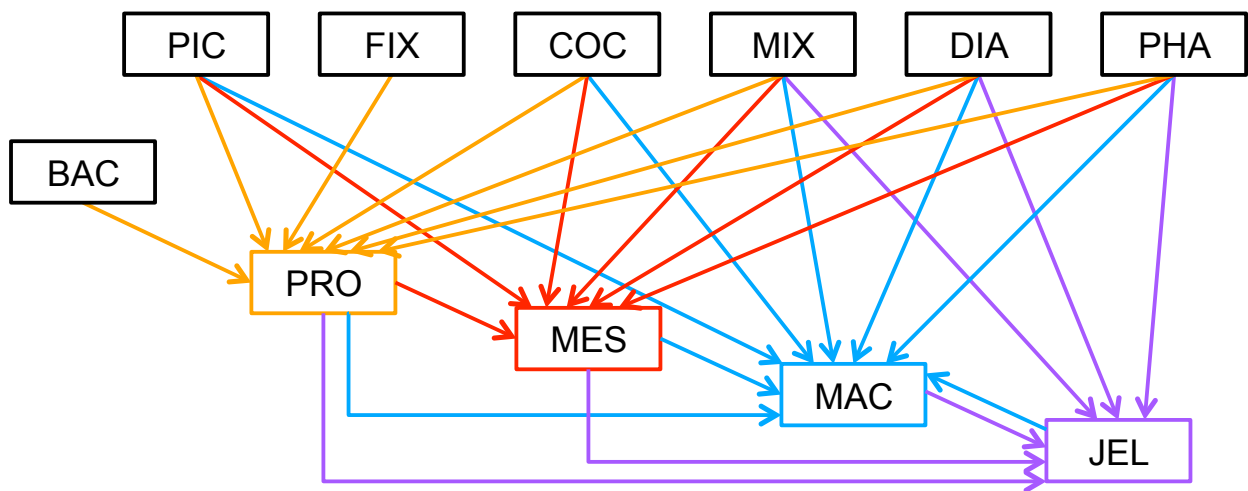

770

771 (b)

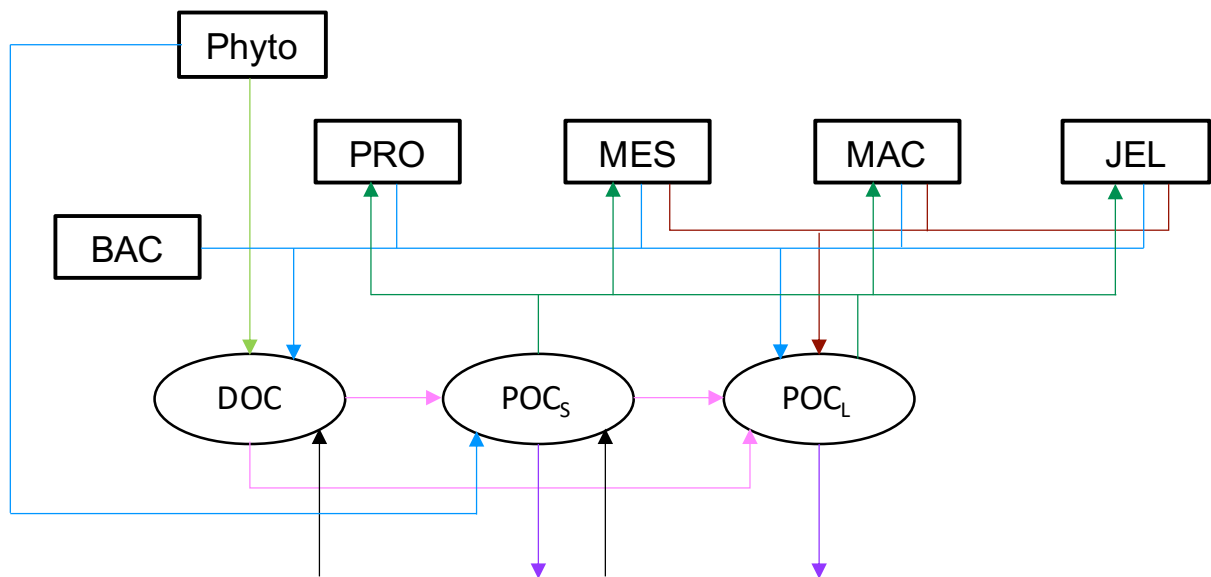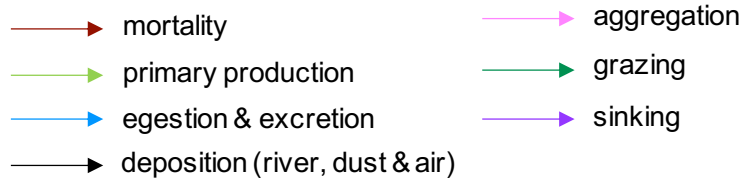

772

773 **Figure 1.** Schematic representation of the PlankTOM11 marine ecosystem model (see Table 1 for  
774 PFT definitions). **(a)** The plankton food web, arrows represent the grazing fluxes by protozooplankton  
775 (orange), mesozooplankton (red), macrozooplankton (blue) and jellyfish zooplankton (purple). Only  
776 fluxes with relative preferences above 0.1 are shown (see Table 3). **(b)** Source and sinks for dissolved  
777 organic carbon (DOC) and small ( $POC_S$ ) and large ( $POC_L$ ) particulate organic carbon.

778

---

**Table 2.** Parameters used to calculate PFT specific growth rate with three-parameter fit (Eq. 3) in PlankTOM11.

---

| PFT | $\mu_{\max}$ (d <sup>-1</sup> ) | T <sub>opt</sub> (°C) | dT (°C) |
|-----|---------------------------------|-----------------------|---------|
| FIX | 0.2                             | 27.6                  | 8.2     |
| PIC | 0.8                             | 24.8                  | 11.2    |
| COC | 1.0                             | 20.4                  | 7.4     |
| MIX | 1.1                             | 34.0                  | 20.0    |
| PHA | 1.4                             | 15.6                  | 13.0    |
| DIA | 1.3                             | 23.2                  | 17.2    |
| BAC | 0.4                             | 18.8                  | 20.0    |
| PRO | 0.4                             | 22.0                  | 20.0    |
| MES | 0.4                             | 31.6                  | 20.0    |
| MAC | 0.2                             | 33.2                  | 20.0    |
| JEL | 0.2                             | 23.6                  | 18.8    |

---

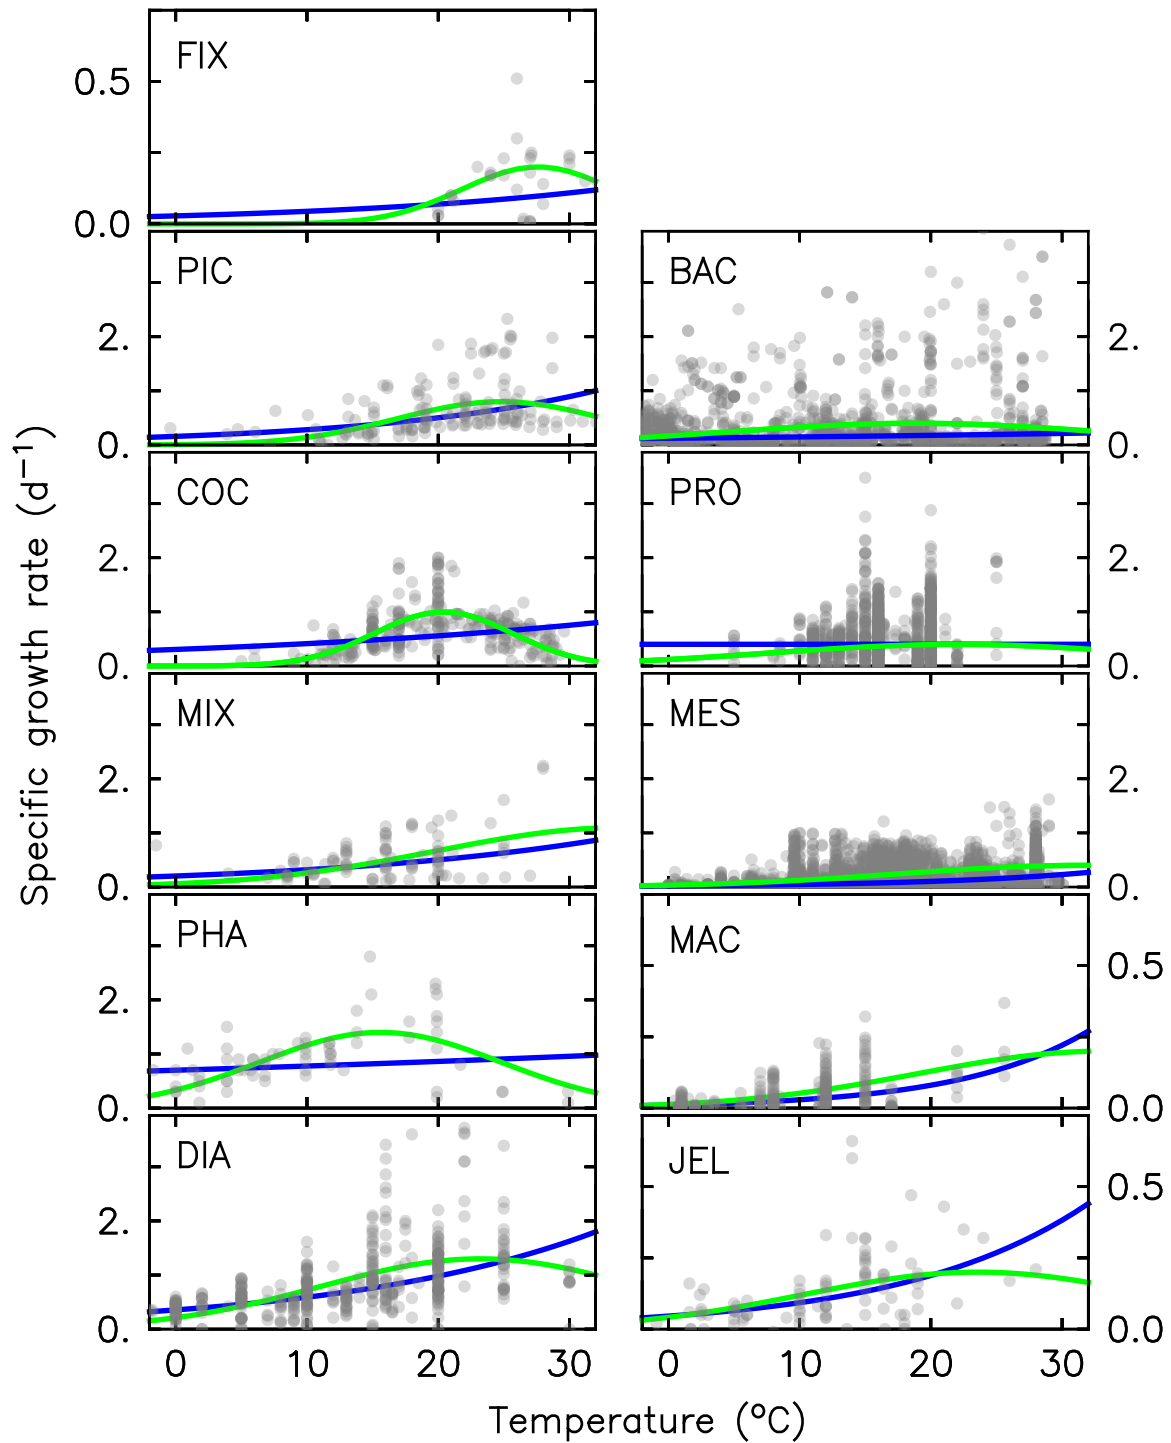

780

781 **Figure 2.** Maximum growth rates for the 11 PFTs as a function of temperature from observations  
 782 (grey circles). The three-parameter fit to the data is shown in green and the two-parameter fit is shown  
 783 in blue, using the parameter values from Table 2. For full PFT names see Table 1. The  $R^2$  for both fits  
 784 to the data are given in Appendix Table A2.

785

**Table 3.** Relative preference, expressed as a ratio, of zooplankton for food (grazing) used in PlankTOM11. For each zooplankton the preference ratio for diatoms is set to 1.

| <b>PFT</b>                | <b>PRO</b> | <b>MES</b> | <b>MAC</b> | <b>JEL</b> |
|---------------------------|------------|------------|------------|------------|
| <b>Autotrophs</b>         |            |            |            |            |
| FIX                       | 2          | 0.1        | 0.1        | 0.1        |
| PIC                       | 3          | 0.75       | 0.5        | 0.1        |
| COC                       | 2          | 0.75       | 1          | 0.1        |
| MIX                       | 2          | 0.75       | 1          | 1          |
| DIA                       | 1          | 1          | 1          | 1          |
| PHA                       | 2          | 1          | 1          | 1          |
| <b>Heterotrophs</b>       |            |            |            |            |
| BAC                       | 4          | 0.1        | 0.1        | 0.1        |
| PRO                       | 0          | 2          | 1          | 7.5        |
| MES                       | 0          | 0          | 2          | 10         |
| MAC                       | 0          | 0          | 0          | 5          |
| JEL                       | 0          | 0          | 0.5        | 0          |
| <b>Particulate matter</b> |            |            |            |            |
| Small organic particles   | 0.1        | 0.1        | 0.1        | 0.1        |
| Large organic particles   | 0.1        | 0.1        | 0.1        | 0.1        |

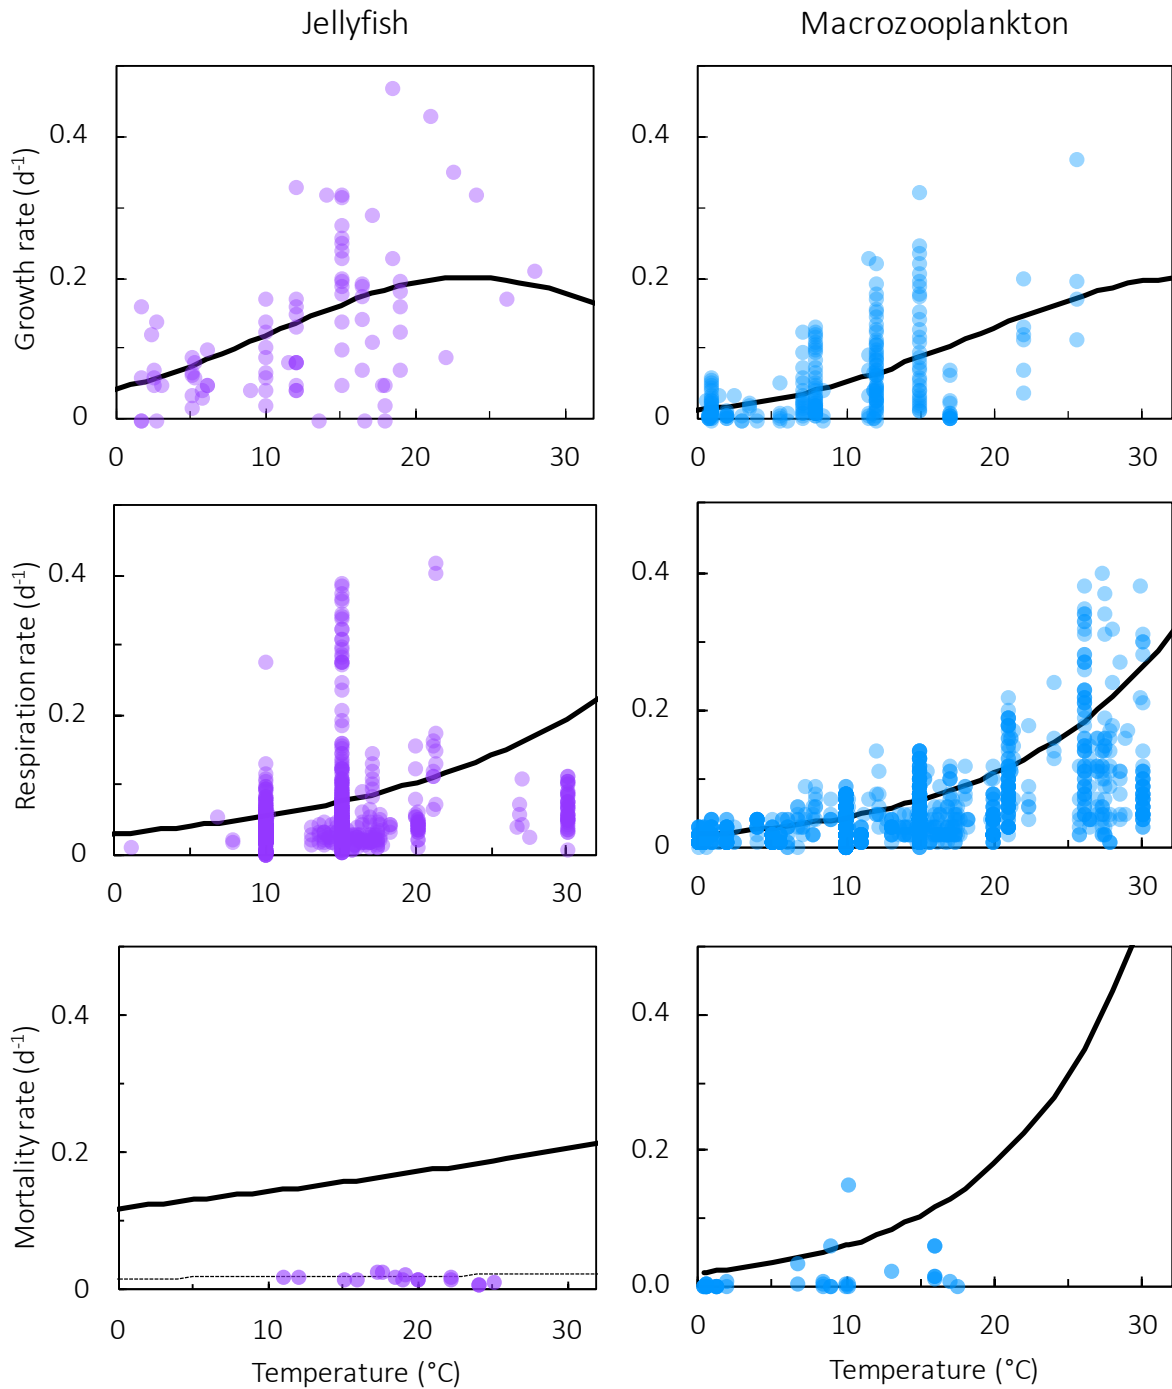

787

788 **Figure 3.** Maximum growth rates (top), respiration rates (middle) and mortality rates (bottom) for  
 789 jellyfish (left; purple) and macrozooplankton (right; blue) PFTs as a function of temperature. The fit  
 790 to the data is shown in black, using the parameter values from Table 2 and Table 4. Growth rates are  
 791 the same as shown in Fig. 2, on a different scale. For jellyfish mortality the thin dashed line is the fit  
 792 to data and the solid line is the adjusted fit (Table 4).

793

794

795

**Table 4.** PlankTOM11 parameter values for macrozooplankton and jellyfish, with the associated equation.

| Parameters                                                                 | JEL     | MAC     | Equation |
|----------------------------------------------------------------------------|---------|---------|----------|
| Respiration                                                                |         |         |          |
| $R_{0^{\circ}}^{Z_j}$ (d <sup>-1</sup> )                                   | 0.03    | 0.01    | Eq. 1    |
| $d_{Z_j}$                                                                  | 1.88    | 2.46    | Eq. 1    |
| Mortality                                                                  |         |         |          |
| $m_{0^{\circ}}^{Z_j}$ (d <sup>-1</sup> )                                   | 0.12    | 0.02    | Eq. 1    |
| $c_{Z_j}$                                                                  | 1.20    | 3.00    | Eq. 1    |
| $K^{Z_j}$ (μmol C L <sup>-1</sup> )                                        | 20.0e-6 | 20.0e-6 | Eq. 1    |
| GGE                                                                        | 0.29    | 0.30    | Eq. 4    |
| Grazing half saturation constant $K_{1/2}^{Z_j}$ (μmol C L <sup>-1</sup> ) | 10.0e-6 | 9.0e-6  | Eq. 5    |

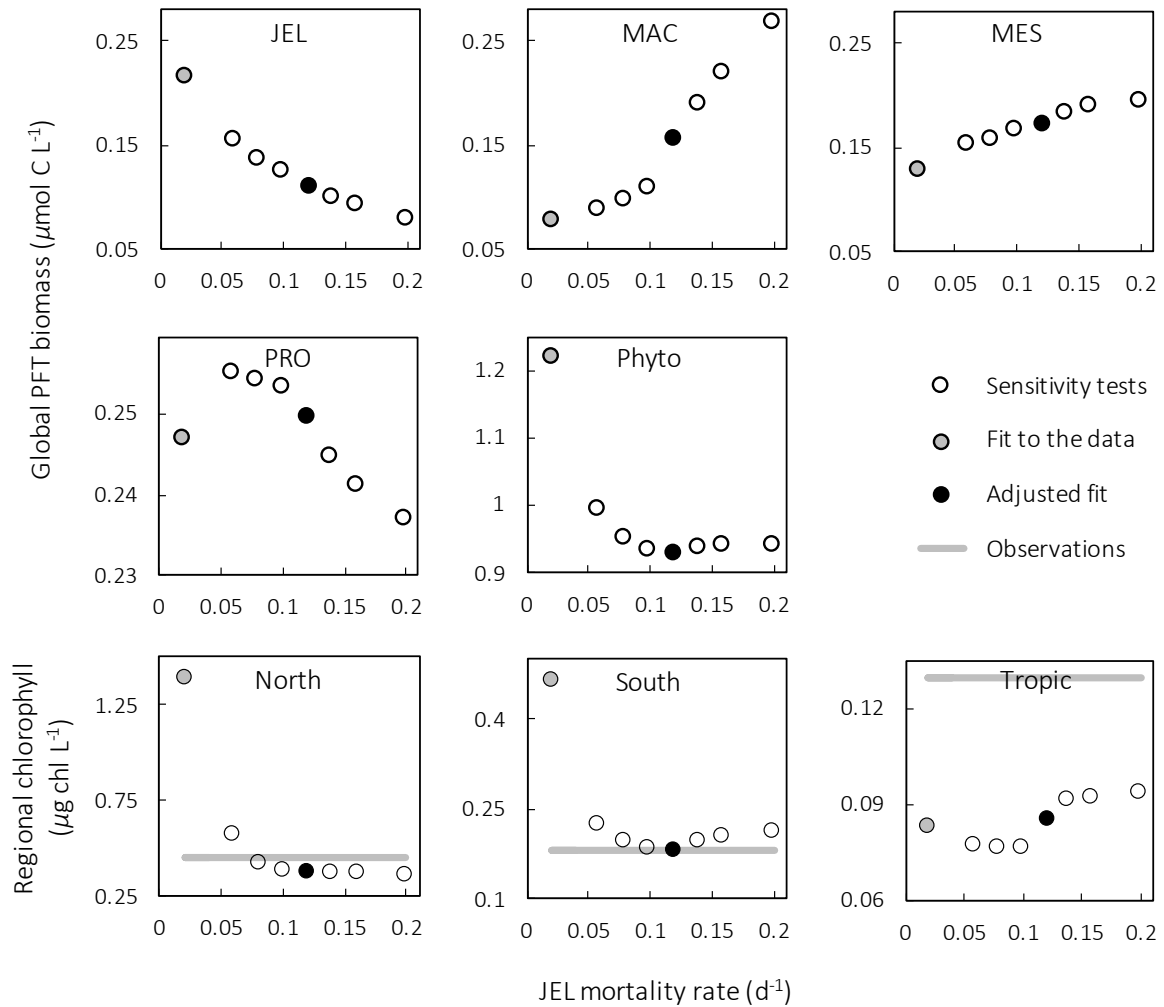

797

798 **Figure 4.** Results from sensitivity tests on jellyfish mortality rates. The adjusted fit simulation used  
 799 for PlankTOM11 is shown by the black filled circle and the fit to the data simulation is shown by the  
 800 grey filled circle; global mean PFT biomass ( $\mu\text{mol C L}^{-1}$ ) for 0-200m depth (top - middle), regional  
 801 mean surface chlorophyll concentration ( $\mu\text{g chl L}^{-1}$ ; bottom). For the regional mean chlorophyll the  
 802 observations are calculated from SeaWiFS. All data are averaged for 1985-2015, and between  $30^\circ$  and  
 803  $55^\circ$  latitude in both hemispheres:  $140\text{-}240^\circ\text{E}$  in the north and  $140\text{-}290^\circ\text{E}$  in the south (see Fig. 8).  
 804 Phyto is the sum of all the phytoplankton PFTs.





**Table 5.** Changes to non-jellyfish PFT parameters across the PlankTOM simulations. PlankTOM10<sup>LQ16</sup> is the latest published version of PlankTOM with 10 PFTs (Le Quéré et al., 2016), while PlankTOM10 is the simulation from this study.

| Parameters      | PlankTOM10 <sup>LQ16</sup> | PlankTOM10 | PlankTOM10.5 | PlankTOM11 |
|-----------------|----------------------------|------------|--------------|------------|
| MAC mortality   | 0.020                      | 0.012      | 0.005        | 0.005      |
| MES respiration | 0.014                      | 0.014      | 0.001        | 0.001      |

811

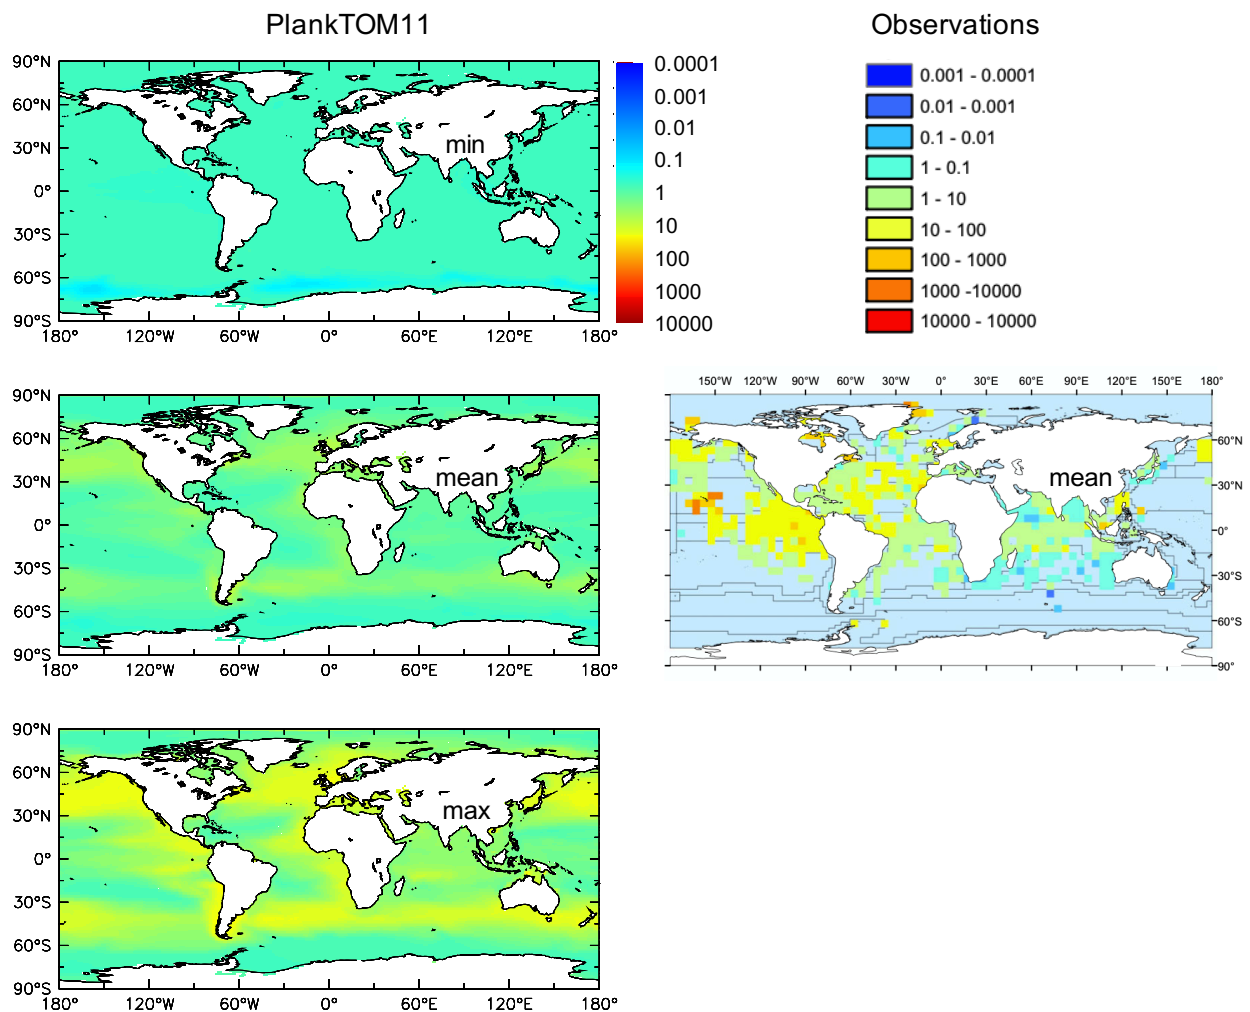

812

**Figure 6.** Jellyfish carbon biomass ( $\text{mg C m}^3$ ) in PlankTOM11 and the observed jellyfish carbon biomass ( $\text{mg C m}^3$ ) from JeDI (panel reproduced from Lucas et al., 2014) on a logarithmic scale. PlankTOM11 results (left) are the mapped monthly minimum, mean and maximum biomass from monthly climatologies. Observations (right) are the mean biomass (with no observations in pale blue). All data is for 0-200m. Only the mean values are available for the observations (Lucas et al. 2014), while for the model the min, mean and max are given. Due to the patchy nature of the observations in depth and time, the mean may be skewed high or low, while the model is sampled across the full time and depth.

**Table 6.** Global mean values for rates and biomass from observations and the PlankTOM11 and PlankTOM10 models averaged over 1985–2015. In parenthesis is the percentage share of the plankton type of the total phytoplankton or zooplankton biomass. The percentage share of mixed-phytoplankton is not included, as there are no mixed-phytoplankton observations, therefore, the phytoplankton percentages are of total phytoplankton minus mixed-phytoplankton. References for observations are given in Appendix Table A5.

|                                                         | PlankTOM11  | PlankTOM10    | Observations         |
|---------------------------------------------------------|-------------|---------------|----------------------|
| <b>Rates</b>                                            |             |               |                      |
| Primary production (PgC y <sup>-1</sup> )               | 41.6        | 43.4          | 51-65                |
| Export production at 100m (PgC y <sup>-1</sup> )        | 7.1         | 7.0           | 5-13                 |
| CaCO <sub>3</sub> export at 100m (PgC y <sup>-1</sup> ) | 1.3         | 1.2           | 0.6-1.1              |
| N <sub>2</sub> fixation (TgN y <sup>-1</sup> )          | 97.2        | 95.9          | 60-200               |
| <b>Phytoplankton biomass 0-200m (PgC)</b>               |             |               |                      |
| N <sub>2</sub> -fixers                                  | 0.065 (8%)  | 0.075 (10%)   | 0.008-0.12 (2-8%)    |
| Picophytoplankton                                       | 0.141 (17%) | 0.153 (20%)   | 0.28-0.52 (35-68%)   |
| Coccolithophores                                        | 0.248 (30%) | 0.212 (27%)   | 0.001-0.032 (0.2-2%) |
| Mixed-phytoplankton                                     | 0.263       | 0.268         | -                    |
| Phaeocystis                                             | 0.177 (22%) | 0.170 (22%)   | 0.11-0.69 (27-46%)   |
| Diatoms                                                 | 0.183 (22%) | 0.167 (21%)   | 0.013-0.75 (3-50%)   |
| Total phytoplankton biomass                             | 1.077       | 1.046         | 0.412 – 2.112        |
| <b>Heterotrophs biomass 0-200m (PgC)</b>                |             |               |                      |
| Bacteria                                                | 0.041       | 0.046         | 0.25-0.26            |
| Protozooplankton                                        | 0.295 (36%) | 0.330 (32.7%) | 0.10-0.37 (27-31%)   |
| Mesozooplankton                                         | 0.193 (23%) | 0.218 (21.6%) | 0.21-0.34 (25-66%)   |
| Macrozooplankton                                        | 0.205 (25%) | 0.460 (45.6%) | 0.01-0.64 (3-47%)    |
| Jellyfish zooplankton                                   | 0.129 (16%) | -             | 0.10-3.11            |
| Total zooplankton biomass                               | 0.823       | 1.008         | 0.42 – 4.46          |

**Table 7.** Jellyfish biomass globally from observations (MAREDAT) and PlankTOM11. Three types of mean are given for the observations; Med is the median, AM is the arithmetic mean and GM is the geometric mean. The ratios are all scaled to mean = 1. All units are  $\mu\text{g C L}^{-1}$ .

|              |     | <b>Mean</b> | <b>Max</b> | <b>Ratio</b> |
|--------------|-----|-------------|------------|--------------|
| Observations | AM  | 3.61        | 156.0      | 1 : 43       |
|              | GM  | 0.95        | 156.0      | 1 : 165      |
|              | Med | 0.29        | 156.0      | 1 : 538      |
| PlankTOM11   | AM  | 1.18        | 98.9       | 1 : 84       |

822

823

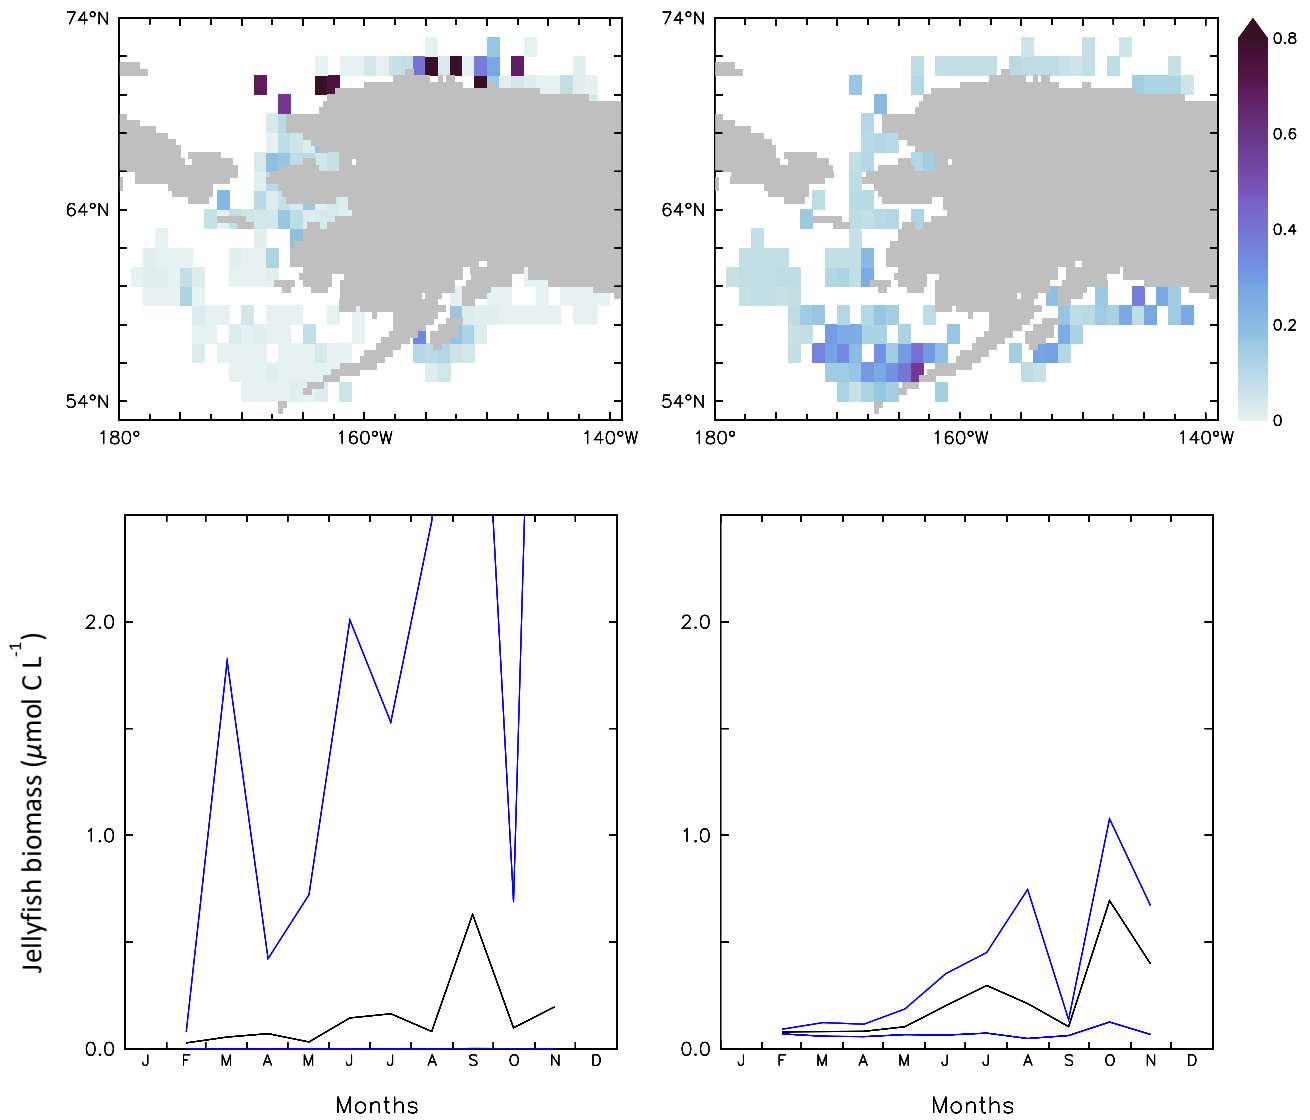

824 **Figure 7.** Carbon biomass of jellyfish in  $\mu\text{mol C L}^{-1}$  from observations (left) and PlankTOM11  
 825 (right) for the coast of Alaska (the region with the highest density of observations). The top panels  
 826 show the mean jellyfish biomass and the bottom panels show the seasonal jellyfish biomass, with the  
 827 monthly mean in black and the monthly minimum and maximum in blue. Observations and  
 828 PlankTOM11 results are for 0-150m, as the depth range where >90% of the observations occur. No  
 829 observations were available for January or December.

830

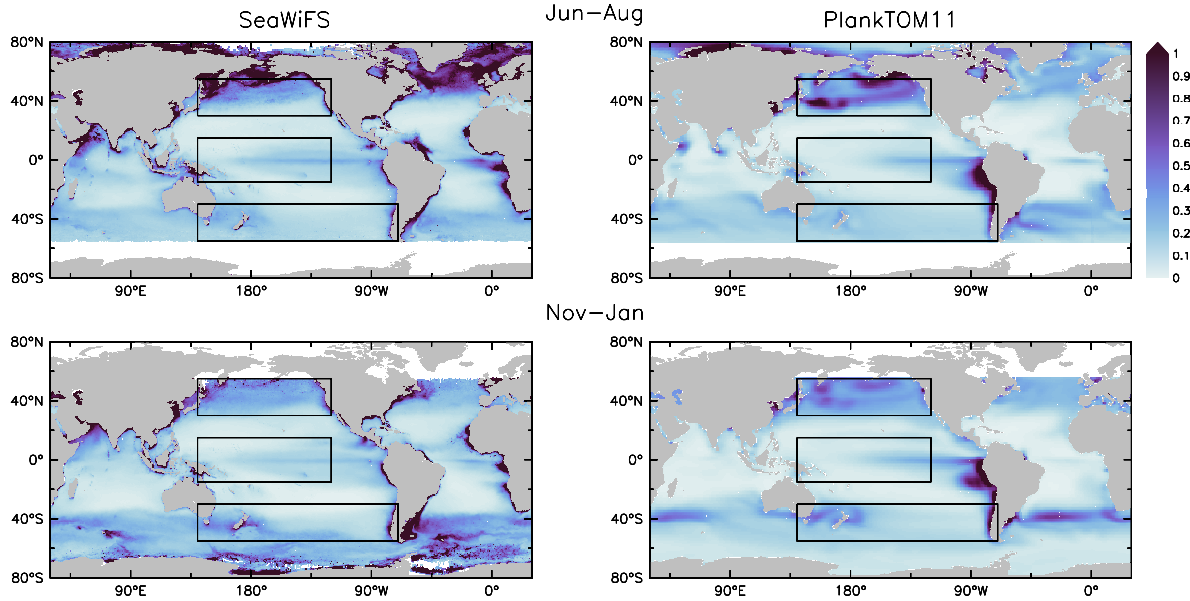

831

832 **Figure 8.** Surface chlorophyll ( $\mu\text{g chl L}^{-1}$ ) averaged for June to August (top) and November to  
 833 January (bottom). Panels show observations from SeaWiFS (left) satellite and results from  
 834 PlankTOM11 (right). Observations and model are averaged for 1997-2006. The black boxes show the  
 835 Pacific north, tropic and south regions used in Fig. 4 and Fig. 9.

836

837

838

839

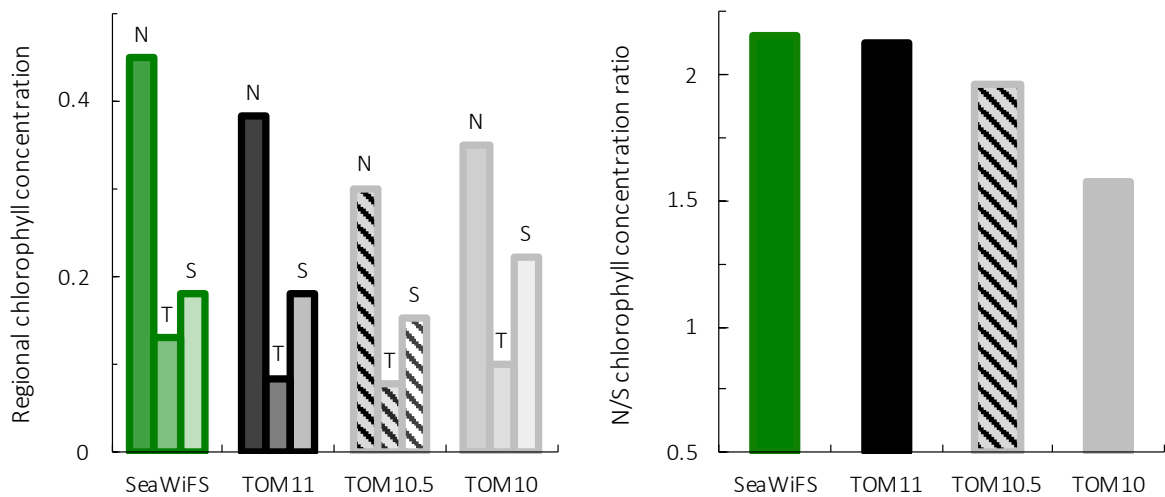

840

841 **Figure 9.** Surface chlorophyll for observations from SeaWiFS satellite, PlankTOM11,  
 842 PlankTOM10.5 and PlankTOM10. Regional chlorophyll concentration in  $\mu\text{g chl L}^{-1}$  (right) for the  
 843 north (N), tropic (T) and south (S) Pacific Ocean regions shown in Fig. 8 and the N/S chlorophyll  
 844 concentration ratio (left). Observations and model are averaged for 1997-2006.

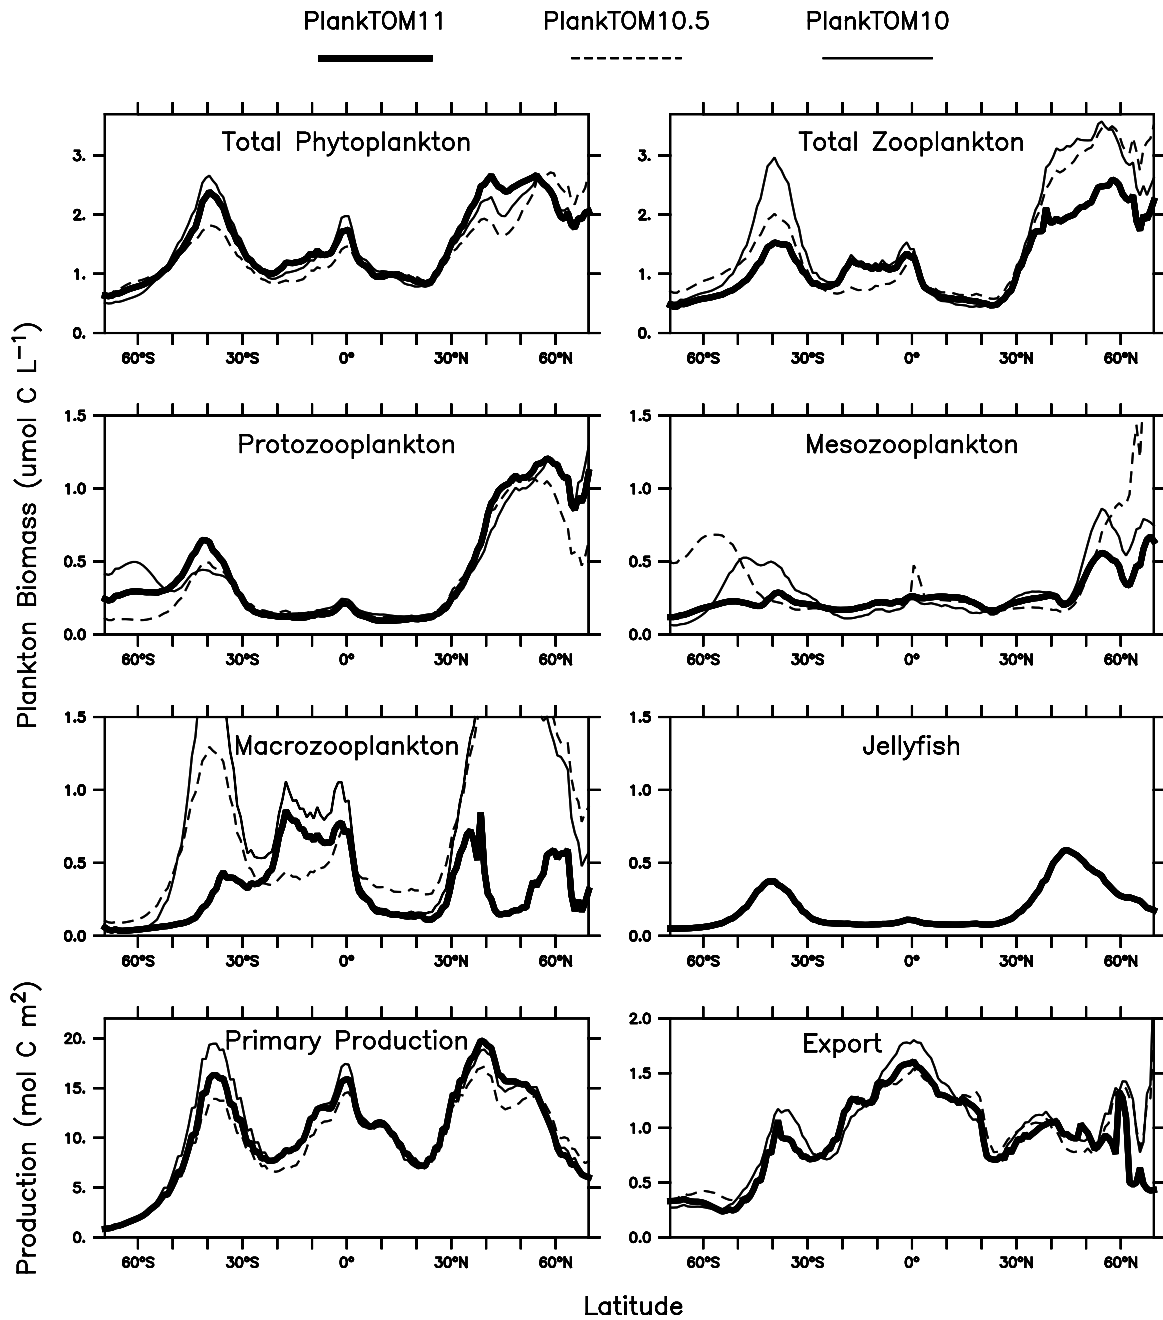

845

846 **Figure 10.** Zonal mean distribution for the PlankTOM11, PlankTOM10.5 and PlankTOM10  
 847 simulations. All plankton biomass data are for the surface box (0-10m). For PlankTOM10.5 the MAC  
 848 PFT has been summed with the 11<sup>th</sup> PFT that duplicates MAC. The bottom panels are the zonal mean  
 849 distribution of primary production, integrated over the top 100m, and export production at 100m. All  
 850 data are averaged for 1985-2015.

851

852

853

854

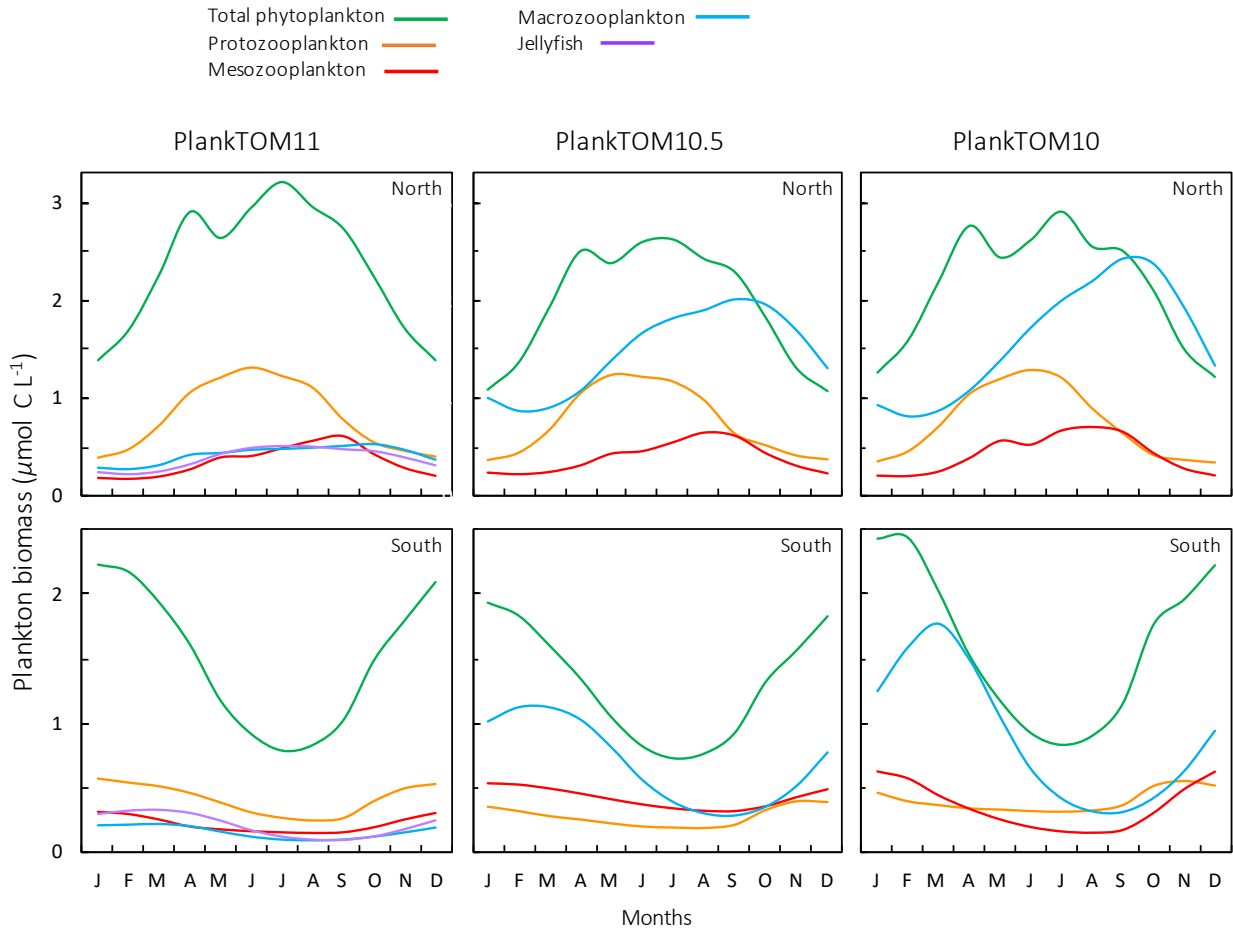

855

856 **Figure 11.** Seasonal surface carbon biomass ( $\mu\text{mol C L}^{-1}$ ) of total phytoplankton PFTs,  
 857 protozooplankton, mesozooplankton, macrozooplankton and jellyfish For PlankTOM10.5 the MAC  
 858 PFT has been summed with the 11<sup>th</sup> PFT that duplicates MAC. Panels shown PFT biomass for  
 859 PlankTOM11 (left), PlankTOM10.5 (middle) and PlankTOM10 (right), for two regions; the north  
 860 30°N - 70°N (top) and the south 30°S - 70°S (bottom) across all longitudes. All data are averaged for  
 861 1985-2015.

862

863



**Table A1:** Sources and metadata for jellyfish growth rates, including references with associated number of data, species and life stage used to inform the growth parameter of jellyfish in PlankTOM11.

| Reference                  | <i>n</i> | Species                                                                     | Life Stage       |
|----------------------------|----------|-----------------------------------------------------------------------------|------------------|
| Båmstedt et al., (1997)    | 3        | <i>Cynea capillata</i>                                                      | Ephyrae          |
| Daan (1986)                | 8        | <i>Sarsia tubulosa</i>                                                      | Medusae          |
| Frandsen & Riisgård (1997) | 5        | <i>Aurelia aurita</i>                                                       | Medusae          |
| Hansson (1997)             | 20       | <i>Aurelia aurita</i>                                                       | Medusae          |
| Møller & Riisgård (2007a)  | 34       | <i>Sarsia tubulosa</i> , <i>Aurelia aurita</i> ,<br><i>Aequorea vitrina</i> | Medusae, ephyrae |
| Møller & Riisgård (2007b)  | 10       | <i>Aurelia aurita</i>                                                       | Medusae, ephyrae |
| Olesen (1994)              | 8        | <i>Aurelia aurita</i> , <i>Chrysaora</i><br><i>quinquecirrha</i>            | Medusae, ephyrae |
| Widmer (2005)              | 10       | <i>Aurelia labiata</i>                                                      | Ephyrae          |

865

**Table A2:** The fit to the growth data for PFT's for the new three-parameter fit used in this study (see Eq. 3 and Fig. 2) and the two-parameter fit (see Eq. 2 and Fig. 2).

| PFT | R <sup>2</sup> |                 | <i>n</i> |
|-----|----------------|-----------------|----------|
|     | Two-parameter  | Three-parameter |          |
| CNI | 9.58           | 11.36           | 98       |
| MAC | 36.57          | 36.76           | 253      |
| MES | 0.32           | 0.34            | 2742     |
| PRO | 0.00           | 7.81            | 1300     |
| BAC | 1.66           | 1.66            | 1429     |
| DIA | 9.59           | 9.58            | 439      |
| PHA | 6.29           | 37.07           | 67       |
| MIX | 21.25          | 19.17           | 95       |
| COC | 33.91          | 36.01           | 322      |
| PIC | 20.17          | 20.29           | 150      |
| FIX | 2.67           | 10.62           | 32       |

**Table A3:** Sources and metadata for jellyfish grazing preferences, including references with associated species, life stage and preference for prey (categorised into PFTs) with any notable phrases used to inform the grazing of jellyfish in PlankTOM11.

| Reference                 | Species/Class/Genera                                                                                                                                                            | Life Stage | PFT preference                                                                                                                                                              |
|---------------------------|---------------------------------------------------------------------------------------------------------------------------------------------------------------------------------|------------|-----------------------------------------------------------------------------------------------------------------------------------------------------------------------------|
| Båmstedt et al. (2001)    | <i>Aurelia aurita</i>                                                                                                                                                           | Ephyrae    | Mixed-phytoplankton, mesozooplankton and particulate organic material                                                                                                       |
| Colin et al. (2005)       | <i>Aglaura hemistoma</i>                                                                                                                                                        | Medusa     | “microplanktonic omnivores”; protozooplankton and some phytoplankton                                                                                                        |
| Flynn and Gibbons (2007)  | <i>Chrysaora hysoscella</i>                                                                                                                                                     | Medusa     | Wide variety ranging in size from protozooplankton to macrozooplankton, with the “numerically dominant” prey as mesozooplankton                                             |
| Malej et al. (2007)       | <i>Aurelia</i> sp.                                                                                                                                                              | Medusa     | Mesozooplankton and protozooplankton                                                                                                                                        |
| Morais et al. (2015)      | <i>Blackfordia virginica</i>                                                                                                                                                    | Medusa     | Mesozooplankton and diatoms                                                                                                                                                 |
| Purcell (1992)            | <i>Chrysaora quinquecirrha</i>                                                                                                                                                  | Medusa     | Mesozooplankton (upto 71% of diet)                                                                                                                                          |
| Purcell (1997)            | Hydromedusa                                                                                                                                                                     |            | “mostly generalist feeders”, mesozooplankton as a preference                                                                                                                |
| Purcell (2003)            | <i>Aurelia labiata</i> , <i>Cyanea capillata</i> , <i>Aequorea aequorea</i>                                                                                                     |            | Mainly mesozooplankton                                                                                                                                                      |
| Stoecker et al. (1987)    | <i>Aurelia aurita</i>                                                                                                                                                           | Medusa     | Protozooplankton and mesozooplankton preferentially removed from “natural mircozooplankton” assemblage. In cultured prey assemblage, larger protozooplankton were selected. |
| Uye and Shimauchi (2005b) | <i>Aurelia aurita</i>                                                                                                                                                           | Medusa     | Mostly mesozooplankton, some protozooplankton                                                                                                                               |
| Costello and Colin (2002) | <i>Aglantha digitale</i> , <i>Sarsia tubulosa</i> , <i>Proboscoidactyla flavicirrata</i> , <i>Aequorea victoria</i> , <i>Mitrocoma cellularia</i> , <i>Phialidium gregarium</i> | Medusa     | Mesozooplankton (crustacean) and protozooplankton (ciliates)                                                                                                                |

867

868

869

870

871

872

**Table A4:** Additional tuning parameter values for PlankTOM11 (see section 2.1.5) following the change to the growth rate formulation. ‘Before growth change’ values are those used in PlankTOM10<sup>LQ16</sup> and ‘after growth change’ values are used in simulations for this study (PlankTOM11, PlankTOM10.5 and PlankTOM10).

| Parameter                                                          | Before growth change | After growth change |
|--------------------------------------------------------------------|----------------------|---------------------|
| Grazing preference ratio of mesozooplankton for <i>Phaeocystis</i> | 0.75                 | 1                   |
| Grazing preference ratio of protozooplankton for picophytoplankton | 2                    | 3                   |
| Half saturation constant of phytoplankton grazing on iron          |                      |                     |
| Diatoms                                                            | 40.0e-9              | 80.0e-9             |
| Picophytoplankton                                                  | 10.0e-9              | 25.0e-9             |
| <i>Phaeocystis</i>                                                 | 25.0e-9              | 80.0e-9             |
| Half saturation constant of bacteria for dissolved organic carbon  | 10.0e-6              | 8.0e-7              |
| Maximum bacteria uptake rate                                       | 3.15                 | 1.90                |
| Diatom respiration                                                 | 0.012                | 0.12                |

873

874

875

876

877

878

879

880

881

882

883

884

885

**Table A5.** Global mean values for rates and biomass from observations with the associated references. In parenthesis is the percentage share of the plankton type of the total Phytoplankton or Zooplankton biomass.

|                                                         | Observations         | Reference for the data                                               |
|---------------------------------------------------------|----------------------|----------------------------------------------------------------------|
| <b>Rates</b>                                            |                      |                                                                      |
| Primary production (PgC y <sup>-1</sup> )               | 51-65                | Buitenhuis et al. (2013b)                                            |
| Export production at 100m (PgC y <sup>-1</sup> )        | 5-13                 | Henson et al. (2011), Palevsky et al. (2018)                         |
| CaCO <sub>3</sub> export at 100m (PgC y <sup>-1</sup> ) | 0.6-1.1              | Lee (2001), Sarmiento et al. (2002)                                  |
| N <sub>2</sub> fixation (TgN y <sup>-1</sup> )          | 60-200               | Gruber (2008)                                                        |
| <b>Phytoplankton biomass 0-200m (PgC)</b>               |                      |                                                                      |
| N <sub>2</sub> -fixers                                  | 0.008-0.12 (2-8%)    | Luo et al. (2012)                                                    |
| Picophytoplankton                                       | 0.28-0.52 (35-68%)   | Buitenhuis et al. (2012b)                                            |
| Coccolithophores                                        | 0.001-0.032 (0.2-2%) | O'Brien et al. (2013)                                                |
| Mixed-phytoplankton                                     | -                    | -                                                                    |
| <i>Phaeocystis</i>                                      | 0.11-0.69 (27-46%)   | Vogt et al. (2012)                                                   |
| Diatoms                                                 | 0.013-0.75 (3-50%)   | Leblanc et al. (2012)                                                |
| <b>Heterotrophs biomass 0-200m (PgC)</b>                |                      |                                                                      |
| Bacteria                                                | 0.25-0.26            | Buitenhuis et al. (2012a)                                            |
| Protozooplankton                                        | 0.10-0.37 (27-31%)   | Buitenhuis et al. (2010)                                             |
| Mesozooplankton                                         | 0.21-0.34 (25-66%)   | Moriarty and O'Brien (2013)                                          |
| Macrozooplankton                                        | 0.01-0.64 (3-47%)    | Moriarty et al. (2013)                                               |
| Jellyfish zooplankton                                   | 0.10-3.11            | Bar-On et al. (2018), Lucas et al. (2014), Buitenhuis et al. (2013b) |

886

887

888

889

890

**Table A6:** Total phytoplankton biomass ( $\mu\text{mol C L}^{-1}$ ) for  $30^\circ\text{N} - 70^\circ\text{N}$  across all longitudes. Observations are from gridded MAREDAT, all data are for the surface ocean (0-10 meters). Phytoplankton types include picophytoplankton, *Phaeocystis*, diatoms, nitrogen-fixers and coccolithophores. The seasonal amplitude is the amplitude for the full seasonal cycle (January – December) and the non-winter amplitude is the amplitude for March – October.

|                              | Seasonal Amplitude | Non-winter Amplitude |
|------------------------------|--------------------|----------------------|
| Observations (median – mean) | 0.78 – 2.67        | 0.70 – 2.12          |
| PlankTOM11                   | 1.82               | 0.97                 |
| PlankTOM10.5                 | 1.54               | 0.80                 |
| PlankTOM10                   | 1.69               | 0.81                 |
| PlankTOM10 <sup>LQ16</sup>   | 1.68               | 1.02                 |

891

892

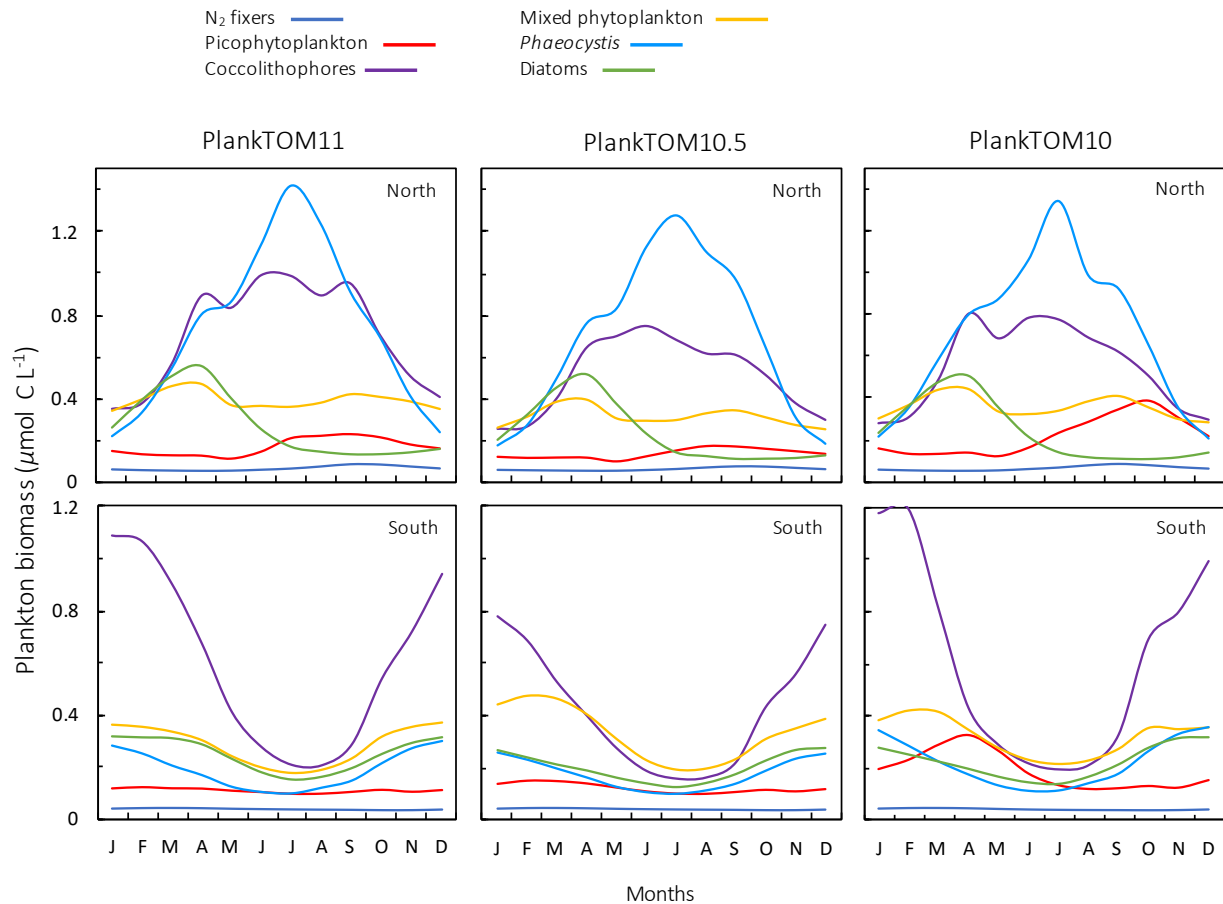

893

894 **Figure A1.** Seasonal surface carbon biomass ( $\mu\text{mol C L}^{-1}$ ) of phytoplankton PFTs;  $\text{N}_2$  fixers,  
 895 picophytoplankton, coccolithophores, mixed phytoplankton, *Phaeocystis* and diatoms. Panels shown  
 896 PFT biomass for PlankTOM11 (left), PlankTOM10.5 (middle) and PlankTOM10 (right), for two  
 897 regions; the north  $30^\circ\text{N} - 70^\circ\text{N}$  (top) and the south  $30^\circ\text{S} - 70^\circ\text{S}$  (bottom) across all longitudes. All data  
 898 are averaged for 1985-2015.

(a) PlankTOM11

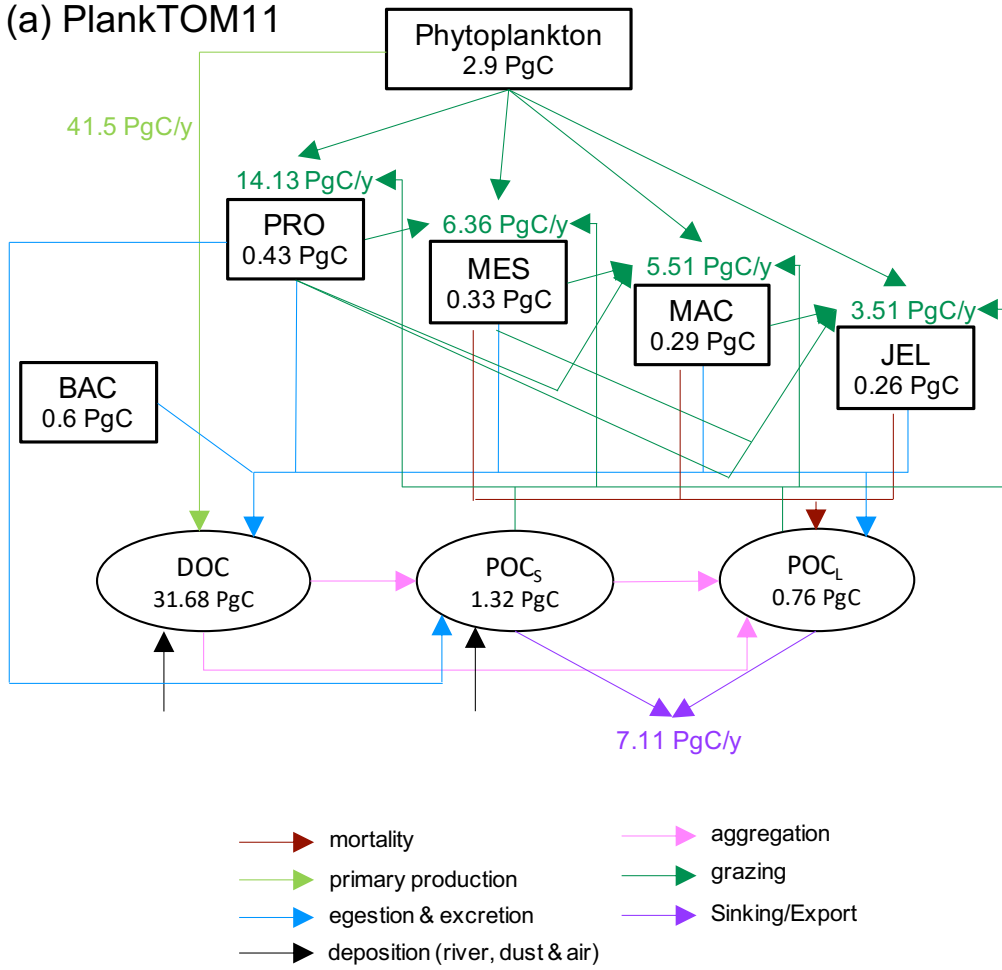

899

(b) PlankTOM10/10.5

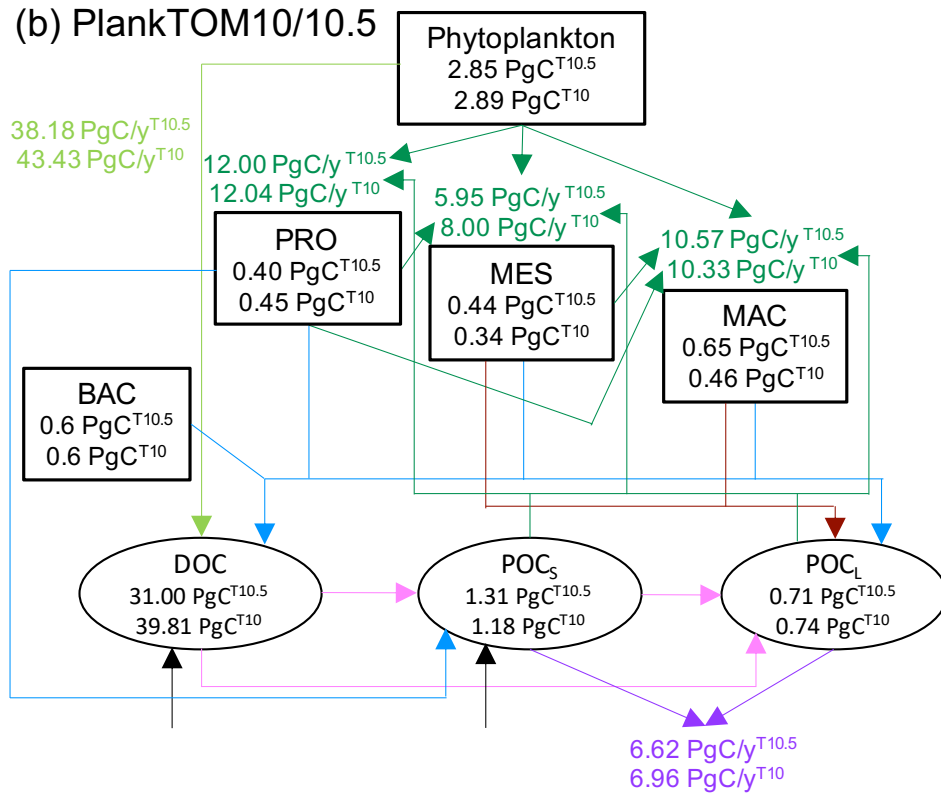

900

901 **Figure A2.** Schematic representation of global carbon biomass and rates in the PlankTOM marine  
902 ecosystem model including sources and sinks for dissolved organic carbon (DOC) and small (POC<sub>s</sub>)  
903 and large (POC<sub>L</sub>) particulate organic carbon. (a) PlankTOM11 and (b) PlankTOM10 and  
904 PlankTOM10.5. Carbon biomass (PgC) of PFT's and organic carbon pools are given within boxes and  
905 ovals, carbon rates (PgC/y) of primary production (light green), grazing (dark green) and export  
906 production (purple) are given next to the corresponding arrows. All data are averaged for 1985 to  
907 2015.

908

909

910
